# Supplementary material for: Gene Signature and Identification of Clinical Trait-Related m6 A Regulators in Pancreatic Cancer
Source: Front Genet. 2020 Jul 10;11:522. doi: 10.3389/fgene.2020.00522 (PMC7367043; doi:10.3389/fgene.2020.00522)
Supplement: TABLE S2 — Sample cluster based on m6A regulators in pancreatic cancer. [file Table_2.xlsx]

## Sheet: Sheet1
Supplementary table 2: Sample cluster based on m6A regulators in pancreatic cancer.
id	futime	fustat	cluster
TCGA-2L-AAQL-01	292	1	1
TCGA-2J-AABI-01	969	0	1
TCGA-3A-A9J0-01	743	0	2
TCGA-3A-A9I7-01	1323	0	2
TCGA-2J-AABO-01	440	0	2
TCGA-IB-7890-01	598	1	1
TCGA-3A-A9IN-01	2084	0	1
TCGA-HZ-7926-01	518	1	2
TCGA-3A-A9IH-01	1021	0	1
TCGA-2J-AABH-01	1287	0	1
TCGA-US-A774-01	695	1	2
TCGA-HZ-8001-01	706	0	1
TCGA-IB-A7M4-01	483	0	2
TCGA-IB-7654-01	476	1	2
TCGA-H6-8124-01	392	0	2
TCGA-PZ-A5RE-01	470	1	2
TCGA-3A-A9I5-01	1794	0	2
TCGA-Z5-AAPL-01	467	0	2
TCGA-2J-AABU-01	277	1	2
TCGA-HZ-A77Q-01	33	0	2
TCGA-FB-AAQ3-01	31	1	2
TCGA-XN-A8T5-01	720	0	2
TCGA-YY-A8LH-01	2016	0	2
TCGA-F2-A8YN-01	517	0	2
TCGA-F2-A44H-01	586	0	1
TCGA-2J-AABV-01	652	1	1
TCGA-HV-AA8X-01	532	1	2
TCGA-US-A77E-01	430	1	1
TCGA-XD-AAUH-01	395	0	2
TCGA-2J-AAB9-01	627	1	2
TCGA-2J-AAB4-01	729	0	2
TCGA-IB-A5SP-01	482	0	2
TCGA-2J-AABF-01	691	1	2
TCGA-FB-A78T-01	375	1	1
TCGA-XN-A8T3-01	951	0	2
TCGA-YH-A8SY-01	388	0	2
TCGA-2J-AABK-01	484	0	2
TCGA-F2-A44G-01	233	1	2
TCGA-2L-AAQM-01	1383	0	1
TCGA-HZ-A49G-01	660	0	1
TCGA-HZ-7923-01	314	0	1
TCGA-FB-AAQ0-01	473	1	2
TCGA-FB-A7DR-01	353	1	2
TCGA-F2-6880-01	289	0	1
TCGA-FB-AAPP-01	485	1	1
TCGA-Q3-A5QY-01	416	0	2
TCGA-HZ-A77P-01	330	0	2
TCGA-M8-A5N4-01	584	0	2
TCGA-2J-AAB1-01	66	1	1
TCGA-IB-7649-01	467	1	1
TCGA-IB-7652-01	1116	0	1
TCGA-FB-AAPQ-01	1130	1	1
TCGA-IB-AAUT-01	287	0	1
TCGA-3A-A9IS-01	998	0	1
TCGA-FB-A545-01	732	1	2
TCGA-IB-AAUU-01	245	0	2
TCGA-XD-AAUG-01	420	0	1
TCGA-HV-A5A6-01	2036	1	2
TCGA-HZ-A4BH-01	194	0	2
TCGA-HZ-7925-01	614	1	2
TCGA-HV-A7OP-01	978	0	1
TCGA-HZ-8315-01	299	1	2
TCGA-XD-AAUL-01	498	0	2
TCGA-FB-A4P6-01	767	0	1
TCGA-IB-7886-01	123	1	2
TCGA-IB-A5ST-01	635	0	2
TCGA-YB-A89D-01	350	0	2
TCGA-IB-AAUP-01	431	0	2
TCGA-IB-A6UG-01	41	1	1
TCGA-IB-AAUQ-01	183	1	2
TCGA-HZ-8003-01	596	1	2
TCGA-3A-A9IV-01	1103	0	1
TCGA-FB-AAPS-01	228	0	2
TCGA-FB-A4P5-01	179	1	2
TCGA-HZ-8002-01	366	1	2
TCGA-US-A779-01	511	1	2
TCGA-HZ-A4BK-01	657	0	2
TCGA-2J-AABT-01	319	0	2
TCGA-HV-A5A3-01	128	1	2
TCGA-IB-AAUO-01	239	1	2
TCGA-HZ-A8P0-01	0	0	1
TCGA-3A-A9IU-01	458	1	2
TCGA-HZ-7922-01	4	0	2
TCGA-H8-A6C1-01	671	0	2
TCGA-HZ-7918-01	969	0	1
TCGA-3A-A9IJ-01	1854	0	1
TCGA-3A-A9IL-01	2741	0	1
TCGA-IB-7889-01	481	1	2
TCGA-FB-AAPY-01	1059	1	2
TCGA-HZ-7919-01	593	1	2
TCGA-IB-7891-01	913	1	2
TCGA-US-A77J-01	568	1	1
TCGA-IB-A7LX-01	250	1	2
TCGA-IB-7893-01	117	1	2
TCGA-2J-AABA-01	607	1	2
TCGA-US-A77G-01	12	1	2
TCGA-HZ-A9TJ-01	603	0	2
TCGA-3A-A9IR-01	1542	0	1
TCGA-IB-AAUR-01	338	0	1
TCGA-HZ-8317-01	378	1	1
TCGA-XD-AAUI-01	366	1	2
TCGA-IB-A6UF-01	666	0	2
TCGA-HZ-8637-01	517	1	2
TCGA-HZ-A77O-01	160	1	2
TCGA-3A-A9I9-01	634	1	1
TCGA-IB-A5SQ-01	219	1	2
TCGA-HZ-7289-01	661	1	2
TCGA-2J-AABR-01	438	0	1
TCGA-IB-8126-01	462	0	1
TCGA-HV-AA8V-01	920	0	1
TCGA-FB-AAPZ-01	716	0	2
TCGA-IB-AAUS-01	225	0	1
TCGA-2J-AABE-01	676	0	2
TCGA-3A-A9IC-01	738	1	2
TCGA-HZ-8638-01	151	1	1
TCGA-HZ-8519-01	454	0	1
TCGA-HV-A7OL-01	252	0	2
TCGA-Q3-AA2A-01	95	0	2
TCGA-LB-A9Q5-01	313	1	2
TCGA-2J-AAB8-01	80	0	2
TCGA-IB-7888-01	1332	1	2
TCGA-IB-7645-01	1502	1	2
TCGA-3E-AAAZ-01	2182	1	1
TCGA-3A-A9IX-01	1037	0	2
TCGA-RB-AA9M-01	286	0	2
TCGA-IB-AAUM-01	8	0	1
TCGA-IB-A5SO-01	365	1	2
TCGA-F2-7273-01	592	1	1
TCGA-RL-AAAS-01	9	0	1
TCGA-L1-A7W4-01	278	1	2
TCGA-2L-AAQE-01	684	1	1
TCGA-OE-A75W-01	267	1	2
TCGA-HZ-A49H-01	491	0	1
TCGA-F2-7276-01	216	1	1
TCGA-IB-AAUW-01	230	1	1
TCGA-IB-7897-01	486	1	1
TCGA-IB-AAUV-01	404	0	1
TCGA-3E-AAAY-01	2285	0	2
TCGA-HV-A5A4-01	232	0	2
TCGA-LB-A7SX-01	393	1	1
TCGA-3A-A9IO-01	1942	0	1
TCGA-3A-A9IB-01	224	1	2
TCGA-IB-7885-01	1257	0	2
TCGA-IB-AAUN-01	144	1	2
TCGA-3A-A9IZ-01	308	1	1
TCGA-FB-AAQ2-01	153	1	1
TCGA-H6-A45N-01	421	1	2
TCGA-F2-6879-01	334	1	2
TCGA-2L-AAQJ-01	394	1	2
TCGA-2J-AAB6-01	293	1	2
TCGA-LB-A8F3-01	379	0	2
TCGA-IB-7647-01	666	1	2
TCGA-HZ-7920-01	236	1	1
TCGA-FB-A5VM-01	498	1	2
TCGA-HZ-7924-01	840	0	1
TCGA-IB-7887-01	110	1	2
TCGA-HZ-8636-01	545	1	2
TCGA-IB-7646-01	145	1	2
TCGA-FB-AAPU-01	381	1	2
TCGA-IB-A5SS-01	460	1	1
TCGA-IB-7651-01	603	1	2
TCGA-HZ-A8P1-01	7	0	2
TCGA-S4-A8RP-01	702	1	2
TCGA-HZ-8005-01	120	1	2
TCGA-US-A776-01	1216	0	1
TCGA-HZ-A49I-01	308	1	1
TCGA-S4-A8RO-01	525	0	1
TCGA-FB-AAQ1-01	123	1	2
TCGA-IB-8127-01	522	0	2
TCGA-S4-A8RM-01	737	0	2
TCGA-F2-A7TX-01	95	1	2
TCGA-2L-AAQI-01	103	1	2
TCGA-2J-AABP-01	463	0	2
TCGA-RB-A7B8-01	466	1	1
TCGA-2L-AAQA-01	143	1	2
TCGA-FB-AAQ6-01	244	1	2
TCGA-IB-7644-01	394	1	2
TCGA-HV-A5A5-01	289	0	2
