# Supplementary material for: Gene Signature and Identification of Clinical Trait-Related m6 A Regulators in Pancreatic Cancer
Source: Front Genet. 2020 Jul 10;11:522. doi: 10.3389/fgene.2020.00522 (PMC7367043; doi:10.3389/fgene.2020.00522)
Supplement: TABLE S8 — Gene signatures of m6A regulators and different expression in pancreatic cancer using GEO. [file Table_8.xls]

Supplementary table 8: Gene signatures of m6A regulators and different expression in pancreatic cancer using GEO.
id	conMean	treatMean	logFC	pValue	GSM711905	GSM711907	GSM711909	GSM711911	GSM711913	GSM711915	GSM711917	GSM711919	GSM711921	GSM711923	GSM711925	GSM711927	GSM711929	GSM711931	GSM711933	GSM711935	GSM711937	GSM711939	GSM711941	GSM711943	GSM711945	GSM711947	GSM711949	GSM711951	GSM711953	GSM711955	GSM711957	GSM711959	GSM711961	GSM711963	GSM711965	GSM711967	GSM711969	GSM711971	GSM711973	GSM711975	GSM711977	GSM711979	GSM711981	GSM711983	GSM711985	GSM711987	GSM711989	GSM711991	GSM711993
METTL3	6.169275111	6.133620667	-0.008362037	0.459691675	5.4647	5.97828	6.18326	6.39562	6.02955	6.17656	6.44702	6.37886	6.01664	6.61625	5.92326	6.17908	5.83189	6.48862	6.1468	5.83253	6.43701	6.05608	6.4884	6.12047	6.12222	5.90381	6.07678	6.33811	6.12205	6.10732	6.27272	5.63657	5.72691	5.94939	5.93834	6.22766	6.42269	6.36449	6.27052	6.17068	6.48161	6.44154	6.60466	6.24641	6.33501	6.09082	6.07137	6.10549	6.39933
METTL14	5.791373333	5.753050667	-0.009578325	0.910498251	5.36843	5.62649	5.40187	6.10016	6.34809	5.4543	5.74872	5.7155	5.58844	5.75978	5.66087	5.4747	5.71613	6.24443	5.49173	5.63148	5.81827	5.81751	6.24689	5.60866	5.68051	5.23009	5.2759	5.84367	5.91931	5.67809	5.9462	5.48669	5.18579	5.77137	5.5994	5.81184	5.92495	5.85785	6.30999	5.74643	6.62634	6.08362	6.05421	5.93	5.9067	6.45579	6.00761	5.39597	6.06103
KIAA1429*	6.005565556	6.896282444	0.199518749	0.011035873	5.78259	5.33189	5.89364	5.95622	6.09811	5.52937	6.03386	5.77822	6.33022	6.01191	5.91415	5.91492	6.37463	6.12203	5.84034	6.12479	6.06751	6.06287	6.25593	5.84397	5.92721	5.72511	5.75605	5.93466	5.99962	5.92139	6.44512	5.2439	6.07844	6.03487	5.78305	6.51525	6.08821	5.90894	6.14751	6.24293	6.43113	6.17132	5.9806	5.9006	6.32991	6.55655	5.93987	5.65692	6.26412
WTAP*	7.000653111	6.712522889	-0.060634419	0.039863425	7.66941	7.16941	5.89364	5.95622	7.66941	7.16941	5.89364	5.95622	6.98617	4.66941	6.89451	7.66941	7.66941	3.10598	7.16941	7.16941	4.66941	7.16941	7.16941	7.03545	7.66941	7.02766	7.16941	7.66941	7.05732	7.16941	7.66941	7.66941	7.66941	7.66941	7.16941	7.12789	7.16941	7.0736	7.16941	7.66941	6.95652	7.33612	7.66941	6.90109	7.66941	7.66941	6.91447	7.66941	7.66941
RBM15	5.462028222	5.508252667	0.01215797	0.338602356	5.25484	5.36975	5.35638	6.07659	5.84999	5.7262	5.52596	5.77844	5.74312	5.52688	5.15865	5.82798	5.19543	5.40079	5.43306	5.47383	5.421	5.05139	5.3918	5.31885	5.3139	4.95907	5.21307	5.34197	5.50206	5.66241	5.98534	5.87267	5.28532	5.25509	5.42947	5.73025	5.09293	5.50964	5.68455	5.38397	5.62627	5.4256	5.73505	5.51196	5.15898	5.22976	5.34456	5.08987	5.56658
RBM15B**	6.177501111	4.245065556	-0.541236532	0.000993594	6.96317	4.89492	7.10875	7.85291	4.11707	7.30025	6.24026	6.29753	6.20739	6.84852	6.30954	4.06149	6.74509	4.10495	7.31823	6.25708	6.09453	6.21256	7.92623	4.32035	6.26362	6.89728	4.98002	4.17714	4.33083	6.94967	7.00798	7.01428	4.66663	3.46738	6.94466	3.19415	6.97775	6.71275	6.77773	6.74413	6.39575	6.9059	6.03813	7.87771	6.96866	6.42669	7.20579	6.86483	7.01727
ZC3H13	6.054372889	6.062598667	0.001958788	0.993593755	5.76544	5.38146	5.98894	6.25021	6.08715	5.73562	5.92731	6.24026	6.29753	6.20739	5.95859	6.03462	5.91915	6.15672	6.14719	5.89785	6.04871	6.22464	6.26098	6.15186	5.9794	5.6982	5.73931	6.06943	6.26479	6.06354	5.95818	5.53171	6.24789	5.99101	5.95072	6.24763	6.06208	6.07942	6.06125	6.32293	6.46075	6.27347	6.1051	6.33741	6.23684	6.37282	5.71931	5.89287	6.0991
FTO	6.227459333	6.302118	0.017193072	0.192086447	5.90074	5.85654	6.56026	6.49894	6.48989	6.30488	6.25104	7.02714	6.18544	6.25055	5.99584	6.41585	6.01892	6.1839	6.26804	6.09281	5.90212	6.19609	6.49721	6.14133	6.4616	5.95202	5.49722	6.21571	6.04309	6.30626	5.61368	5.89883	6.00774	5.85593	6.26138	6.20737	6.12706	6.63786	6.67891	6.1161	6.52738	6.181	6.34063	6.68724	6.11489	6.22658	6.37129	6.53979	6.32858
ALKBH5**	7.189989778	6.488732889	-0.148052941	0.000398634	7.66941	7.16941	7.66941	6.08715	5.73562	5.92731	7.66941	7.16941	6.98617	7.66941	6.89451	7.66941	7.16941	6.24026	6.29753	6.20739	7.66941	7.16941	7.16941	7.03545	7.66941	7.02766	7.16941	7.66941	7.05732	7.16941	7.66941	7.66941	7.66941	7.66941	7.16941	7.12789	7.16941	7.0736	7.16941	7.66941	6.95652	7.33612	7.66941	6.90109	7.66941	7.66941	6.91447	7.66941	7.66941
YTHDF1*	6.387350889	6.591039556	0.045288322	0.026666981	5.91922	6.06059	6.41609	6.48989	6.30488	6.25104	6.3375	6.54843	6.35797	6.53527	6.50224	6.07114	6.7548	6.37608	6.67608	6.33241	6.31058	6.24352	6.3566	6.57706	6.33876	6.69672	6.07792	6.18752	6.76847	6.29915	6.21658	6.47179	6.61893	6.54169	6.29828	6.57791	6.54186	6.32299	6.4439	6.19845	6.48677	6.28189	6.56505	6.23864	6.32323	6.49404	6.21541	6.30672	6.49673
YTHDF2	5.602310667	5.571007333	-0.008083773	0.398634251	5.59884	5.30942	5.4788	5.94074	5.29158	5.24978	5.70537	5.83155	5.67008	5.62416	5.77144	5.47526	5.43041	5.73866	5.47851	5.41599	5.52323	5.45965	5.64743	5.79081	5.55481	5.66254	5.81621	5.6581	5.81143	5.47715	5.69786	6.15403	5.379	5.64071	5.12031	5.88836	5.5237	5.69025	5.52237	5.55122	5.74893	5.60041	5.56038	5.61639	5.77112	5.72616	5.56419	5.55594	5.3807
YTHDF3	6.142430444	6.121664889	-0.004885545	0.398634251	5.08468	5.70374	6.32079	6.6896	6.22187	5.0593	6.12405	6.30865	6.37454	6.16162	6.21011	6.49471	5.80527	6.22527	6.20105	5.86075	6.00941	6.13516	6.23657	6.52427	5.97811	6.04626	5.69056	6.10085	6.2371	5.95396	6.67098	5.7016	6.10275	6.20067	5.9118	6.33301	6.2532	6.37562	6.14311	6.22108	6.4488	6.74124	6.21736	6.25735	6.04072	6.44158	6.25386	6.0284	6.30799
YTHDC1	7.220756889	7.152060889	-0.013791051	0.110358734	7.28555	6.65502	7.11664	7.40331	7.43063	6.70392	7.44155	7.19859	7.26665	7.1668	7.23734	7.19707	7.25065	7.53936	6.85757	7.1031	7.19572	7.40298	7.38238	7.16621	7.17511	6.85383	6.96604	7.28544	7.47734	7.09782	7.53603	6.21051	7.07539	7.09484	6.92206	7.40584	7.44401	7.05685	7.50089	7.34539	7.64202	7.44823	7.28918	7.17442	7.26314	7.74922	7.27159	7.15682	7.49101
YTHDC2	6.575138222	6.514676889	-0.013327596	0.156220844	5.66302	6.18722	6.78555	7.08402	6.94967	5.74348	6.60684	7.21869	6.63809	6.47402	6.56424	6.84607	6.02484	6.77451	6.40429	6.10277	6.57852	6.68167	6.88998	6.75908	6.37811	6.06775	6.18851	6.61579	6.81886	6.52841	7.10448	5.41101	6.4557	6.57218	6.58395	6.69338	6.42122	6.5751	6.882	6.84714	7.15752	7.03966	6.96802	6.88745	6.51217	6.73763	6.71288	6.03536	6.71037
IGF2BP1	3.546391333	3.548397556	0.000815913	0.840900641	3.9557	3.69744	3.58784	3.34345	3.38589	3.68221	3.43932	3.43876	3.42321	3.31736	3.92421	3.46174	3.59755	3.27702	3.55695	3.75742	3.64396	3.49108	3.33099	3.44415	3.41281	3.7206	4.04583	3.40962	3.48534	3.25509	3.61354	3.86827	3.53927	3.82765	3.52866	3.40031	3.53687	3.32585	3.25699	3.63447	3.60277	3.40885	3.35871	3.58847	3.80089	3.72785	3.65126	3.55195	3.27944
IGF2BP2***	4.323338444	5.107620889	0.240505666	1.16E-07	3.96768	4.34943	3.9574	3.45862	3.12205	4.01815	4.58694	5.50703	3.67271	4.58481	3.93819	3.72428	4.769	4.65	4.93861	3.82993	4.28166	4.7227	4.44429	4.42898	4.04513	4.19654	4.33981	4.7797	4.53081	4.51862	5.33915	4.18502	4.51616	4.08524	3.94003	5.55309	4.04012	3.98601	3.82423	4.55905	3.67959	4.57405	4.78519	4.30153	3.77184	3.94991	4.48518	4.19496	5.41681
IGF2BP3***	2.795849333	3.961728444	0.502843378	9.91E-08	2.45503	2.57155	2.5126	2.94305	2.78141	2.77352	2.70206	3.03419	2.68332	2.90353	2.34394	2.86217	2.73544	3.51128	4.91244	2.46586	2.8518	2.647	3.33021	2.76278	2.71192	2.52349	2.60894	2.50996	2.72846	2.41895	2.82202	2.9653	2.50882	2.55947	2.62039	2.83547	1.94547	2.56862	3.62634	2.49342	2.85434	3.18107	2.45715	2.85114	2.91771	2.65596	2.2995	3.06705	3.29908
HNRNPC***	8.525307333	9.968841556	0.22567402	2.26E-22	8.64279	8.65447	8.41516	8.67482	8.67918	8.45466	8.47328	8.60922	8.64919	8.60663	8.78089	8.37668	8.59712	8.5295	8.59373	8.39553	8.27718	8.14247	8.44424	8.71124	8.60435	8.51944	8.42006	8.23684	8.72718	8.28215	8.56306	8.64812	8.59303	8.61635	8.45281	8.42763	8.5096	8.47841	8.93362	8.76635	8.57739	8.56686	8.5829	8.65396	8.06081	8.76221	8.37124	8.29862	8.27786
HNRNPA2B1	9.968841556	10.06242022	0.013479576	0.176043542	9.6228	9.69985	9.9097	10.5284	10.1991	9.66477	10.1056	10.0432	9.94676	9.97226	10.164	10.2792	9.36711	10.2716	9.97849	9.52594	9.81492	9.81602	10.1121	10.123	9.95955	9.93684	9.49568	10.043	9.88521	10.0903	10.3118	8.51937	9.62775	9.92606	9.95285	10.4232	9.9213	9.9649	10.2503	10.0263	10.0594	10.2467	10.4131	10.056	9.79976	9.96238	10.1511	10.0653	10.3649
[truncated: 45 more columns]
