# Supplementary material for: Gene Signature and Identification of Clinical Trait-Related m6 A Regulators in Pancreatic Cancer
Source: Front Genet. 2020 Jul 10;11:522. doi: 10.3389/fgene.2020.00522 (PMC7367043; doi:10.3389/fgene.2020.00522)
Supplement: TABLE S9 — Lasso regression was constructed examining the relationship between gene signature and pancreatic cancer risk verified by GEO data. [file Table_9.xlsx]

## Sheet: Sheet1
Supplementary table 9: Lasso regression was constructed examining the relationship between gene signature and pancreatic cancer risk verified by GEO data.
id	futime	fustat	METTL3	KIAA1429	YTHDF1	IGF2BP2	IGF2BP3	HNRNPC	Risksore	Risk
GSM711904	51	1	5.99123	5.96317	6.6627	5.23649	4.07294	8.64279	253.493	low
GSM711906	7	1	5.35521	5.89492	7.21228	6.26337	6.13083	8.65447	244.457	high
GSM711908	3	1	6.0612	6.10875	7.34065	7.30239	5.46875	8.41516	167.416	high
GSM711910	42	1	5.93036	5.85291	6.39456	3.90878	2.70165	8.67482	141.764	low
GSM711914	36	1	5.97797	6.30025	6.23652	4.87175	4.25372	8.45466	176.424	low
GSM711916	2	1	6.31605	5.8878	6.52377	5.16211	2.44987	8.47328	402.012	high
GSM711922	19	1	6.43659	5.84852	7.002	5.49522	4.82816	8.60663	150.79	high
GSM711924	13	1	6.08026	6.30954	6.49081	5.29127	2.81954	8.78089	169.937	high
GSM711926	16	1	6.36521	6.06149	6.49346	5.18941	4.41665	8.37668	153.438	high
GSM711928	41	1	6.31022	5.74509	6.2352	5.3855	3.49562	8.59712	218.708	low
GSM711930	3	1	6.05577	6.10495	6.64135	6.58425	4.85113	8.5295	144.902	high
GSM711932	12	1	6.02863	6.31823	6.8197	5.5128	5.57596	8.59373	178.498	high
GSM711934	25	1	6.09456	6.25708	6.5157	4.78999	3.94509	8.39553	203.237	low
GSM711936	38	0	6.30443	6.09453	6.0643	4.04399	3.15837	8.27718	162.316	low
GSM711938	1	0	6.25365	6.21256	6.73194	4.1452	2.62447	8.14247	220.842	high
GSM711940	13	1	6.30055	5.92623	6.68053	4.58177	4.07171	8.44424	161.035	high
GSM711942	23	1	6.02374	6.32035	6.55206	4.68131	5.4666	8.71124	379.435	low
GSM711944	11	1	6.76184	6.26362	6.4959	4.21827	3.51617	8.60435	162.762	high
GSM711946	29	1	5.83272	5.89728	6.53576	4.24846	2.60901	8.51944	164.789	low
GSM711948	28	1	6.32544	6.08002	6.38604	4.66817	2.46965	8.42006	216.824	low
GSM711950	28	0	6.39664	6.17714	6.54763	4.41587	2.77469	8.23684	225.76	low
GSM711952	14	1	6.05682	5.33083	7.1045	6.47276	5.39803	8.72718	105.795	high
GSM711954	7	1	6.1487	5.94967	6.49219	5.47712	4.50949	8.28215	128.4	high
GSM711956	28	0	5.9647	6.00798	6.82202	5.23123	4.19632	8.56306	103.969	low
GSM711958	24	0	6.30617	6.01428	6.24374	5.0922	4.70581	8.64812	124.668	low
GSM711960	24	0	6.16489	5.66663	6.42026	4.7303	3.88104	8.59303	123.587	low
GSM711962	8	1	6.16443	6.46738	6.21179	5.49905	5.54921	8.61635	90.5949	high
GSM711964	22	0	5.81636	5.94466	6.41033	5.29352	2.5483	8.45281	133.429	low
GSM711966	21	0	6.26236	6.19415	6.40629	5.28749	3.51427	8.42763	129.223	low
GSM711968	21	0	6.48393	6.17775	6.46059	4.94715	3.98693	8.5096	130.063	low
GSM711970	9	1	6.12155	5.71275	6.36103	5.15483	4.79186	8.47841	128.712	high
GSM711972	17	0	6.4134	6.77773	6.51609	5.46569	4.19192	8.93362	103.329	low
GSM711974	6	1	5.81142	5.74413	6.5994	4.77103	4.26762	8.76635	122.72	high
GSM711976	16	0	6.42911	6.39575	6.44849	5.02622	3.06401	8.57739	119.902	low
GSM711978	5	1	6.32003	6.1059	6.50484	4.64273	2.9523	8.56686	106.045	high
GSM711980	11	0	6.21575	6.03813	6.35224	4.57381	2.39344	8.5829	120.792	low
GSM711982	4	1	6.23672	5.87771	6.3334	5.91944	5.2039	8.65396	131.759	high
GSM711984	10	1	5.87138	5.96866	6.52369	3.69621	2.94598	8.06081	112.991	high
GSM711986	10	0	5.59352	6.42669	7.31141	5.79412	6.56793	8.76221	130.125	high
GSM711988	15	1	6.12176	6.20579	6.82852	5.16325	4.30179	8.37124	87.5421	low
GSM711990	5	1	6.10993	5.86483	6.10128	3.94993	3.54811	8.29862	96.8322	high
GSM711992	13	1	6.28492	6.01727	6.88138	4.9148	2.74186	8.27786	100.804	high
